# Supplementary material for: Activity-dependent regulation of T-type calcium channels by submembrane calcium ions
Source: eLife journal article supplement (doi:10.7554/elife.22331), 2017-01-21
Supplement: supp [file elife-22331-supp-v1.zip]

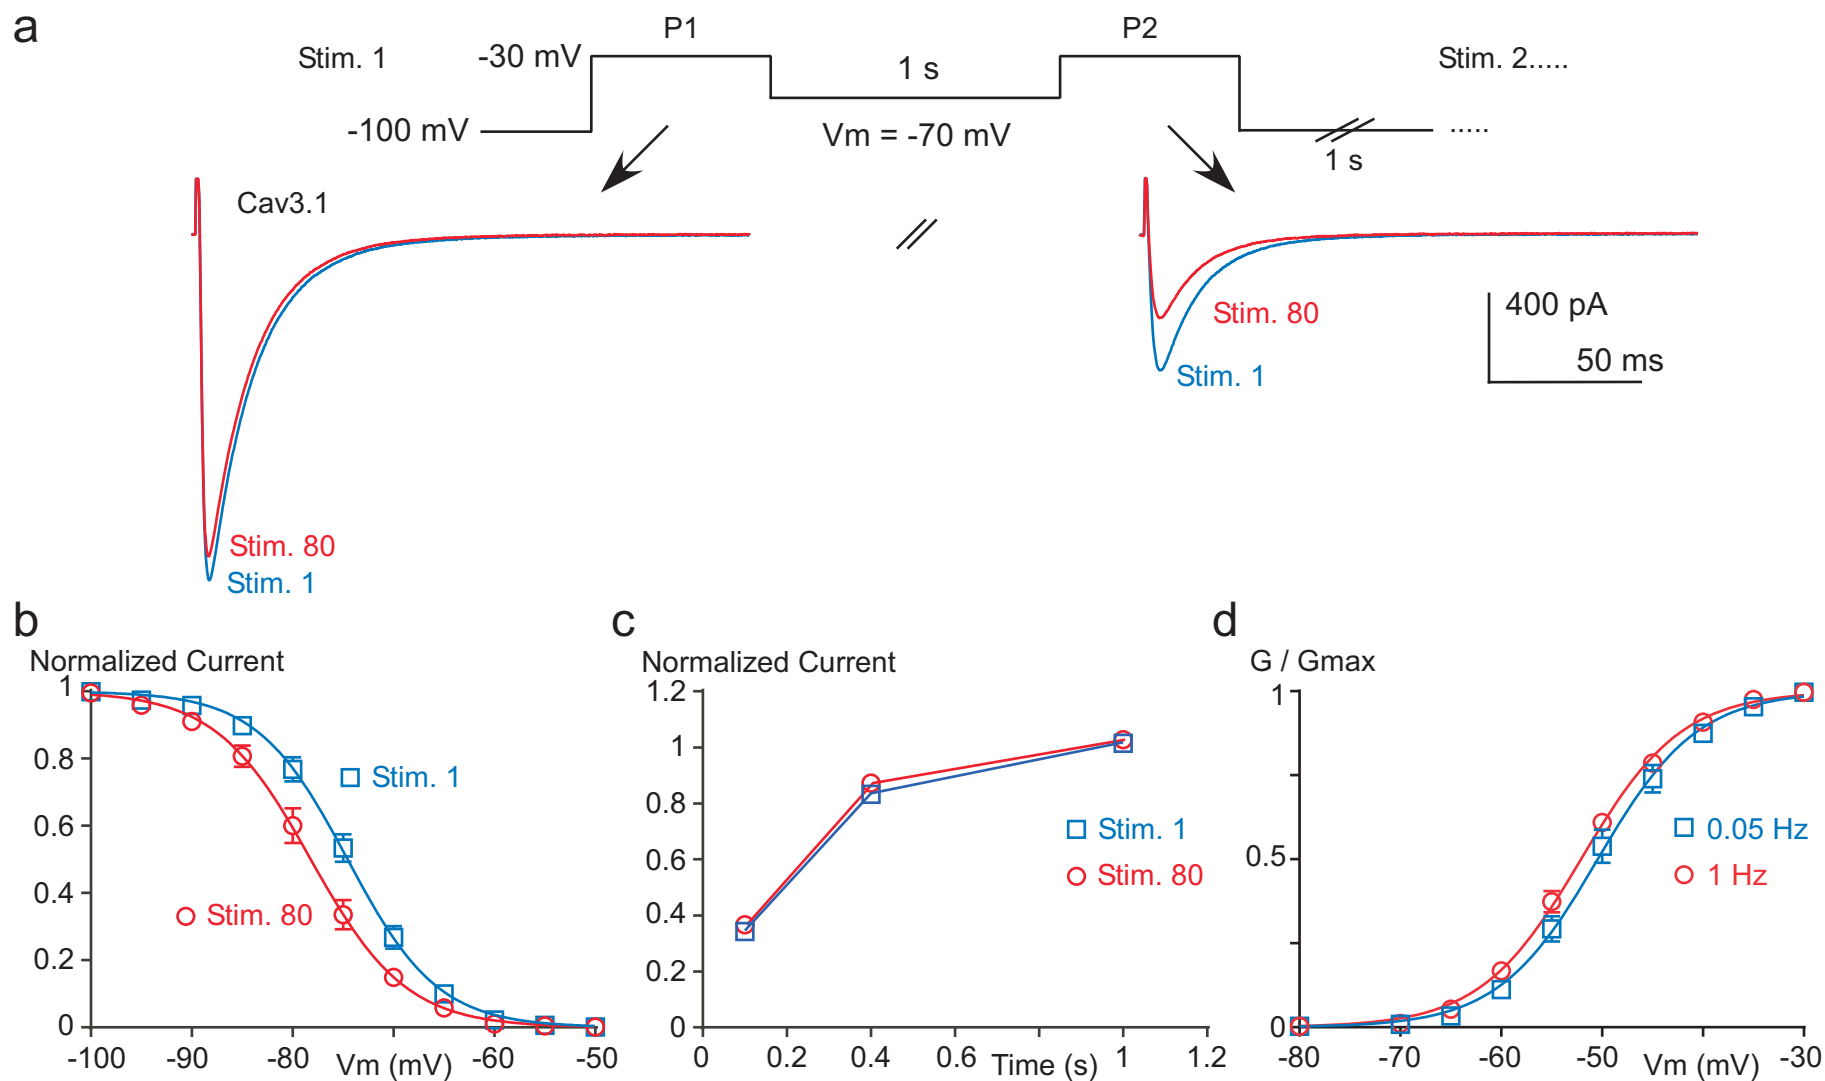

**Figure 3- figure supplement 1. Paired-pulse stimulation at high frequency induces a negative shift in the Cav3.1 steady-state inactivation properties.** **(a-b)** Steady-state inactivation of the Cav3.1 current measured using a paired-pulse stimulation (inter-stimulation 1s) applied 80 times (Stim 1 to Stim 80). The membrane potential ( $V_m$ ) between the two pulses ranged from -110 to -50 mV, as illustrated in **(a)** for a  $V_m$  of -70 mV. Steady-state inactivation (measured at P2) as a function of the  $V_m$  is determined for the first stimulation (Stim 1) and for the 80<sup>th</sup> stimulation (Stim 80, **(b)**,  $n=5-13$  per point). **(c)** Recovery from short-term inactivation of the Cav3.1 current measured by a paired-pulse stimulation (inter-stimulation 1s) applied 80 times (Stim 1 to Stim 80). The recovery from short-term inactivation, as a function of the interpulse duration (100, 400 or 1000 ms) is quantified for the first stimulation (Stim 1) and for the 80<sup>th</sup> stimulation ( $n=8-9$  per point). **(d)** Activation curve of the Cav3.1 current measured during 1 Hz or 0.05 Hz stimulation. The Cav3.1 current was stimulated at 1 Hz or 0.05 Hz until reaching the steady-state just before I-V protocols, which were performed by a double-pulse protocol to maintain the 1 Hz stimulation effect ( $n=6$ ).
