# Supplementary material for: Activity-dependent regulation of T-type calcium channels by submembrane calcium ions
Source: eLife journal article supplement (doi:10.7554/elife.22331), 2017-01-21
Supplement: supp [file elife-22331-supp-v1.zip]

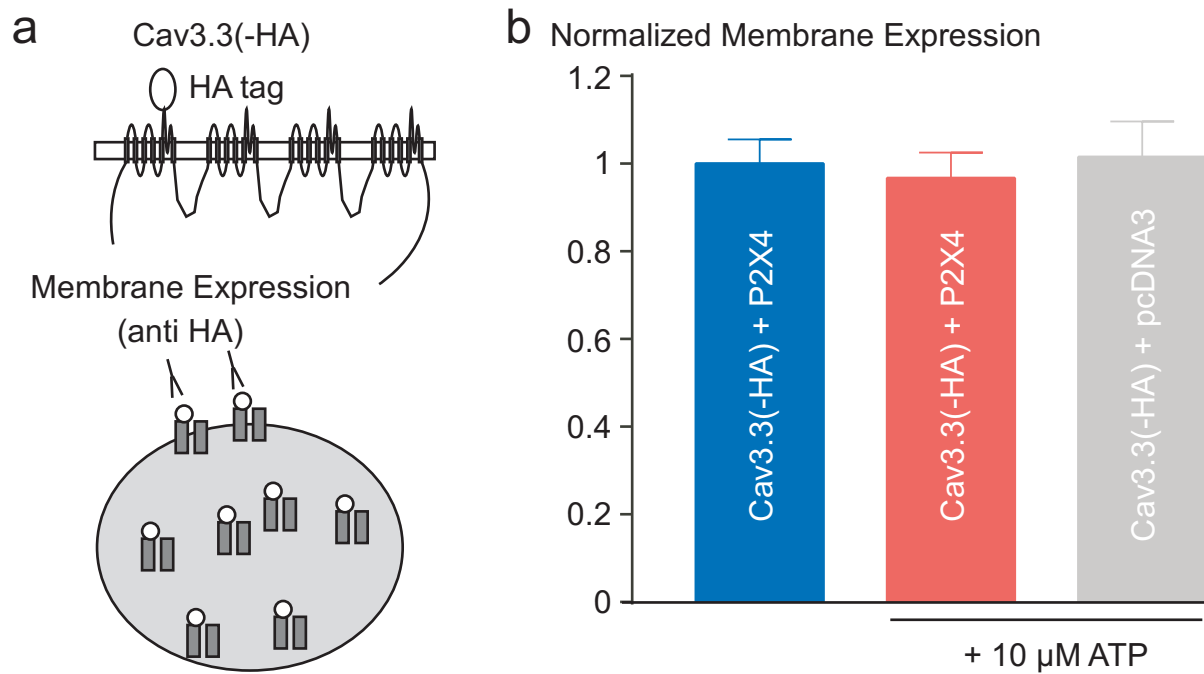

**Figure 7 - figure supplement 1. Effect of P2X4 activation on membrane density of Cav3.3 channels.**

**(a)** Schematic representation of a Cav3.3 channel construct containing an extracellular HA tag (located in the IS5-pore loop) used to measure its membrane expression in tsA-201 cells. The cells were co-transfected with the Cav3.3 channel and either the P2X4 receptor or the pcDNA3 plasmid. **(b)** Quantification by ELISA/luminometry of the membrane expression levels of HA-tagged Cav3.3 channels after treatment with 10  $\mu$ M ATP. The histogram represents relative light unit (RLU) normalized toward the values obtained in the control condition (P2X4 without ATP treatment).
