# Supplementary material for: Activity-dependent regulation of T-type calcium channels by submembrane calcium ions
Source: eLife journal article supplement (doi:10.7554/elife.22331), 2017-01-21
Supplement: supp [file elife-22331-supp-v1.zip]

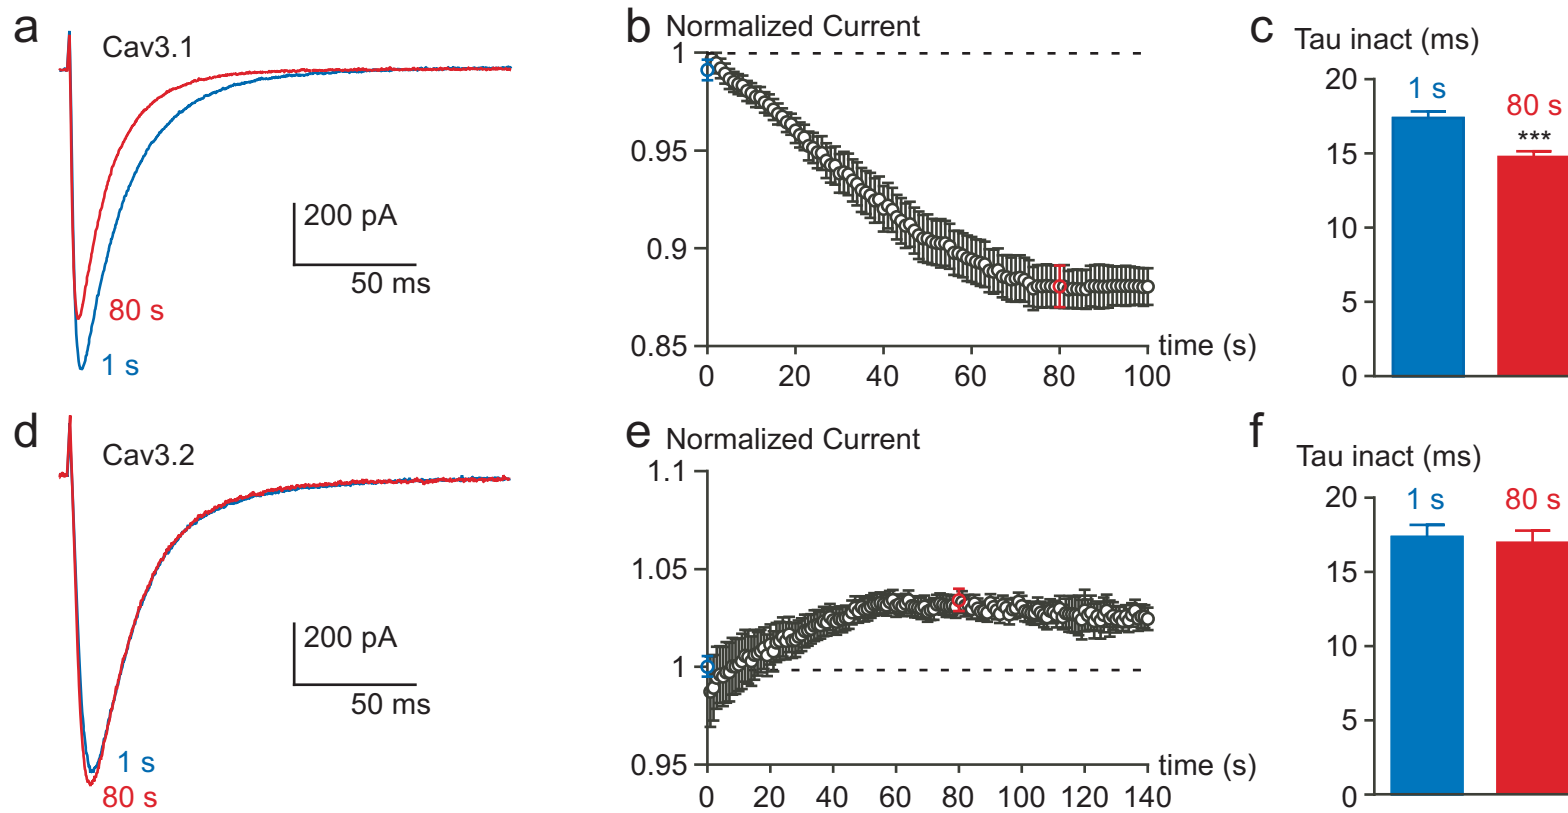

**Figure 2- figure supplement 2. Inhibition of the Cav3.1 current at a high frequency of TP stimulation but not of the Cav3.2 current.** Typical examples of Cav3.1 and Cav3.2 currents elicited by a TP stimulation at a frequency of 1 Hz (TP of -30 mV, 180 ms duration) from a HP of -100 mV. **(a)** Cav3.1 current recorded at the beginning of the stimulation (1 s) and after 80 s stimulation (80 s). **(b)** Time-course of the Cav3.1 current inhibition during this 1 Hz stimulation protocol (n=40). **(c)** Inactivation kinetics of the Cav3.1 current measured at the beginning (1 s) and after 80 s of stimulation (n=40). **(d)** Cav3.2 current recorded at the beginning of the stimulation (1 s) and after 80 s stimulation. **(e)** Time-course of the Cav3.2 current during a 1 Hz stimulation protocol (n=23). **(f)** Inactivation kinetics of the Cav3.2 current measured at the beginning (1 s) and after 80 s stimulation (n=23).
