# Supplementary material for: Activity-dependent regulation of T-type calcium channels by submembrane calcium ions
Source: eLife journal article supplement (doi:10.7554/elife.22331), 2017-01-21
Supplement: supp [file elife-22331-supp-v1.zip]

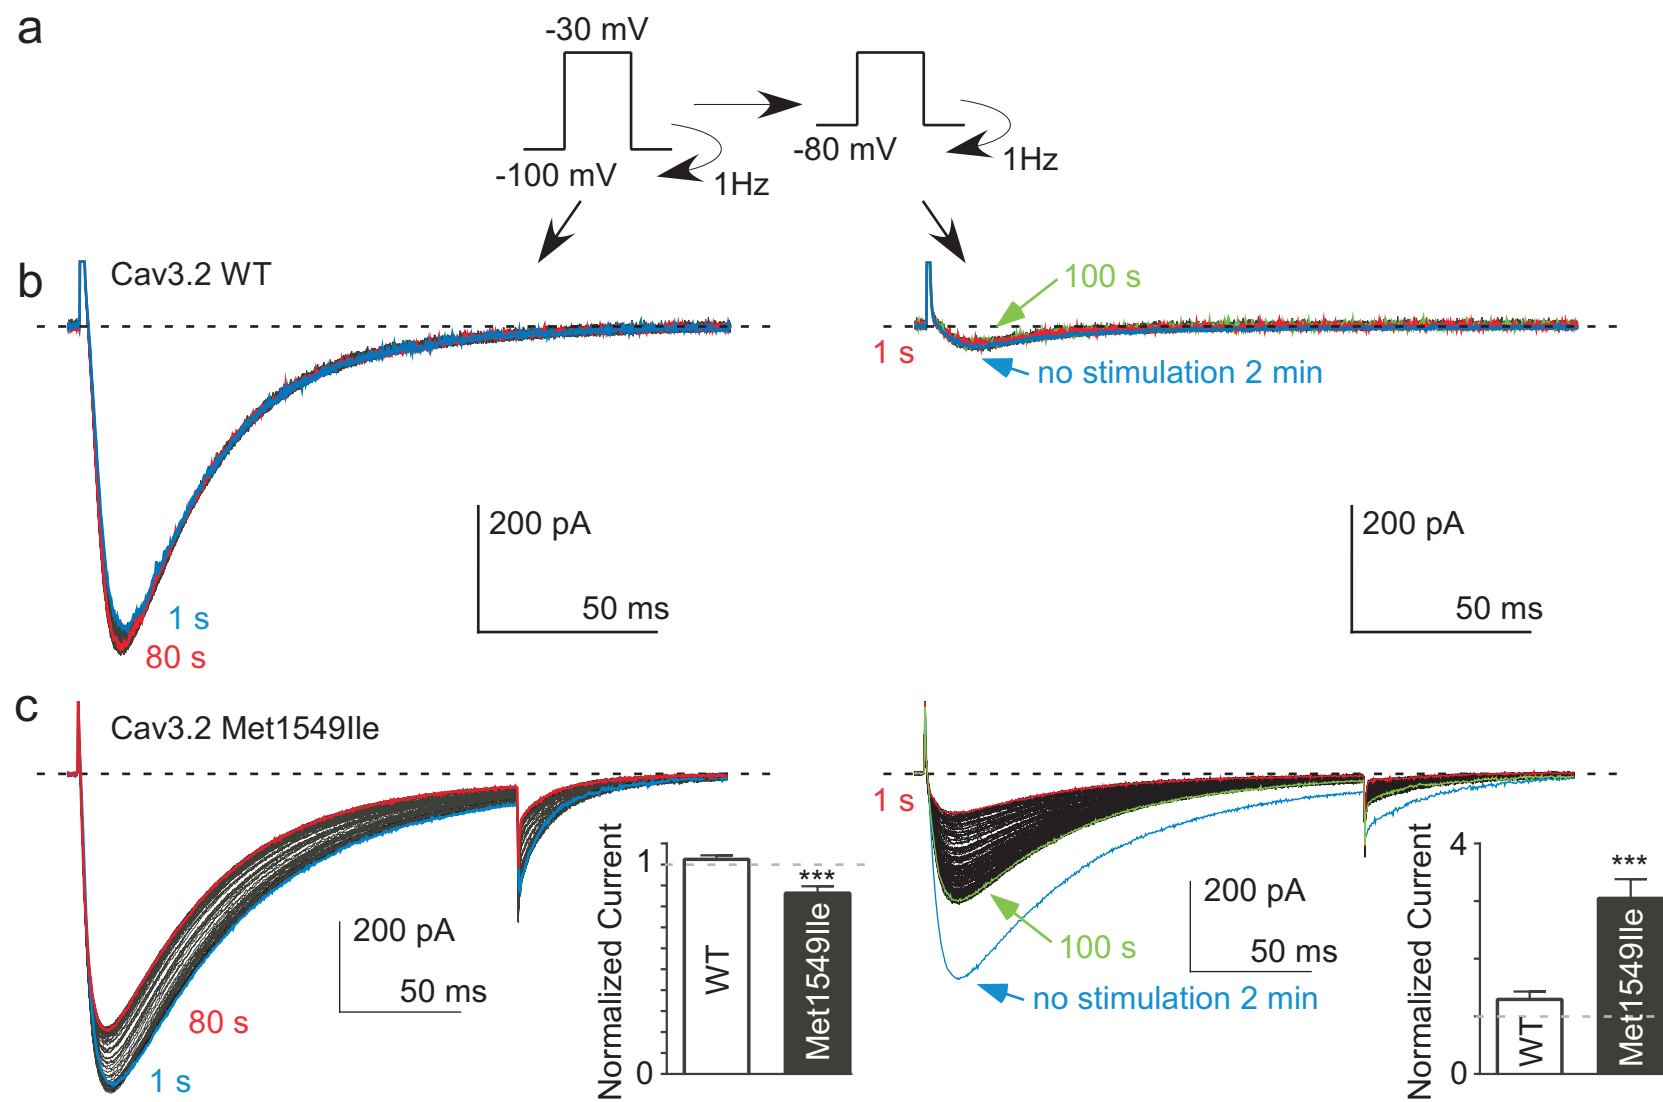

**Figure 5 - figure supplement 1. Modulation of the Cav3.2 Met1549Ile mutant channel at a high frequency of stimulation.**

Similar to that described for Figure 5, the Cav3.2 current recovery was measured at a HP of -80 mV (a-b, right panels) after their inhibition by 1 Hz stimulation at a HP of -100 mV (a-b, left panels) for wild-type (WT) Cav3.2 channels (b) and for the Cav3.2 Met1549Ile channels (c). The average current decrease at HP -100 mV and the average current increase at HP -80 mV are shown in (c) as insets in the left and the right panels, respectively (n=23-31).
