# Supplementary material for: Activity-dependent regulation of T-type calcium channels by submembrane calcium ions
Source: eLife journal article supplement (doi:10.7554/elife.22331), 2017-01-21
Supplement: supp [file elife-22331-supp-v1.zip]

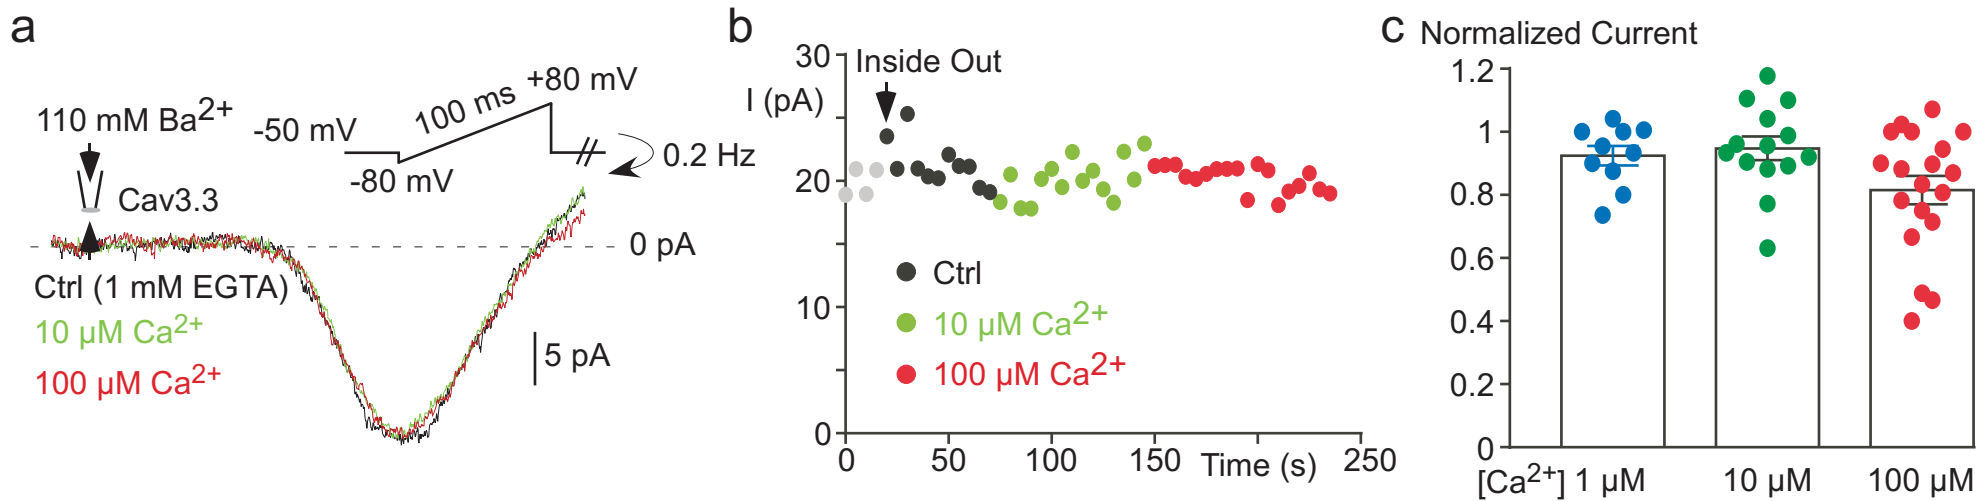

**Figure 2- figure supplement 1. Effect of free  $\text{Ca}^{2+}$  application on the Cav3.3 current recorded in cell-free inside-out patches.**

**(a)** Effect of 10  $\mu\text{M}$  and 100  $\mu\text{M}$   $\text{Ca}^{2+}$ -containing solution on the Cav3.3 current recorded during voltage-ramp protocols in the inside-out patch configuration. **(b)** Time course of the Cav3.3 current during the experiment presented in (a). **(c)** Scatter plot and average effect of 1  $\mu\text{M}$ , 10  $\mu\text{M}$  and 100  $\mu\text{M}$   $\text{Ca}^{2+}$ -containing solution ( $n=10-19$  per bar).
