# Supplementary material for: Activity-dependent regulation of T-type calcium channels by submembrane calcium ions
Source: eLife journal article supplement (doi:10.7554/elife.22331), 2017-01-21
Supplement: supp [file elife_poa_e22331_Response_to_the_Changes_needed_for_revised_submission.docx]

Dear Tara,

We have corrected the ms, as you have requested.

***Thank you for sending the revised version of your work for consideration at eLife. We have checked your submission and we would like to ask you to address the following points before we proceed:

*Thank you for advising us in your references of a paper that is 'in press'. If you are able to add any further information like estimated publication date, potential location/doi/means of accessing the paper, or any other information you can provide it would be much appreciated.***

The paper of Daniil is now accepted, and we have corrected the ms.

DANIIL, G., FERNANDES-ROSA, F. L., CHEMIN, J., BLESNEAC, I., BELTRAND, J., POLAK, M., JEUNEMAITRE, X., BOULKROUN, S., AMAR, L., STROM, T. M., LORY, P. & ZENNARO, M. C. 2016. CACNA1H Mutations Are Associated With Different Forms of Primary Aldosteronism. *EBioMedicine,* 13**,** 225-236.

****Please could you provide further details for the cell lines used in the experiments reported in your article: please report their source, confirm the identity has been authenticated, state the authentication method (such as STR profiling), and report the mycoplasma contamination testing status. These details should be added to the manuscript e.g. in the Materials and Methods.***

This is mentioned p19.

“tsA-201 cells (RRID:CVCL_2737) were obtained from the European Collection of Authenticated Cell Cultures (ECACC 96121229). The identity of tsA201 has been confirmed by STR profiling and the cells have been eradicated from mycoplasma at ECACC. We routinely tested the cells for the absence of the mycoplasma contamination.”

***Please also provide justification if you have used any cell lines from the list of commonly misidentified cell lines maintained by the International Cell Line Authentication Committee. Cell line authentication services are offered by ATCS, Science Exchange, and others***.

tsA-201 cells are not in this list.

****In the event of acceptance for publication, we will publish the individual author contributions online, alongside the paper, in the "Article and author info" tab (an example is available here:*** [***https://elifesciences.org/content/5/e22429/article-info***](https://elifesciences.org/content/5/e22429/article-info)***). With this in mind, we would like to ask you to remove the author contributions statement in your article file and include this information in the submission form only. eLife follows the Contributor Roles Taxonomy (CrediT), but free text can also be provided.***

This was deleted.

****Please could you provide us with an ethics statement that includes the name of the institutional review board/ethics committee that approved this study, and any protocol or reference numbers associated with the ethical approval of your work.***

This is mentioned p19.

“All animal use procedures were done in accordance with the directives of the French Ministry of Agriculture (A 34-172-41).”

****To help promote the identification, discovery, and reuse of key research resources, we encourage you to include Research Resource Identifiers (RRIDs) within the Materials and Methods section to identify model organisms, cells lines, antibodies, and tools (such as software or databases) you have used (e.g. RRID:AB_2178887 for an antibody, RRID:MGI:3840442 for an organism, RRID:CVCL_1H60 for a cell line, and RRID:SCR_007358 for a tool). The RRID Portal (***[***https://scicrunch.org/resources***](https://scicrunch.org/resources)***) lists existing RRIDs, and instructions for creating a new one if an RRID matching the resource does not already exist.***

This is mentioned p19.

“tsA-201 cells (RRID:CVCL_2737) were obtained from the European Collection of Authenticated Cell Cultures (ECACC 96121229). “

**** If you haven't already, and where relevant, we also encourage you to upload relevant additional data files, such as numerical data that are represented as a graph in a figure, or as a summary table. Where provided, these should be in the most useful format, and they can be uploaded as "Source data" files linked to main figures and/or tables (e.g., Figure 1-source data 1, Table 1-source data 1)***

Examples of original raw data are always presented in all figures for each bars or graph presented (as original raw electrophysiological traces).

Sincerely,

Jean Chemin
